# Supplementary material for: Oxygen-deficient TiO2 and carbon coupling synergistically boost the activity of Ru nanoparticles for the alkaline hydrogen evolution reaction
Source: Royal Society of Chemistry journal article supplement (doi:10.1039/d0ta11986e), 2021-01-01
Supplement: d0ta11986e1.pdf [file d0ta11986e1.pdf]

## Supporting Information

### **Oxygen-deficient TiO<sub>2</sub> and carbon coupling synergistically boost Ru nanoparticles for alkaline hydrogen evolution reaction**

Zhongzhe Wei<sup>a</sup>, Zijiang Zhao<sup>a</sup>, Jing Wang<sup>b,\*</sup>, Qiang Zhou<sup>a</sup>, Chenxia Zhao<sup>a</sup>, Zihao Yao<sup>a</sup>,  
Jianguo Wang<sup>a,\*</sup>

E-Mail: [jgw@zjut.edu.cn](mailto:jgw@zjut.edu.cn)

<sup>a</sup>Institute of Industrial Catalysis, College of Chemical Engineering, Zhejiang University of Technology, Hangzhou 310032, P. R. China.

<sup>b</sup> Institute of Advanced Magnetic Materials, College of Materials and Environmental Engineering, Hangzhou Dianzi University, Hangzhou, Zhejiang 310018, P. R. China.

**Table S1.** The element analysis results for different catalysts.

| Sample                                    | C (%) | H (%) | Ru (%) |
|-------------------------------------------|-------|-------|--------|
| Ru/TiO <sub>2</sub> @C-0                  | 0.08  | 0.43  | -      |
| Ru/TiO <sub>2</sub> -V <sub>0</sub> @C-5  | 7.00  | 0     | 3.2    |
| Ru/TiO <sub>2</sub> -V <sub>0</sub> @C-10 | 12.17 | 0.77  | 3.0    |
| Ru/TiO <sub>2</sub> -V <sub>0</sub> @C-15 | 13.58 | 0.97  | 2.9    |
| Ru/TiO <sub>2</sub> -V <sub>0</sub> @C-20 | 14.33 | 1.02  | 2.8    |

**Table S2.** Summary of the recently reported noble metal-based HER catalysts.

| Catalyst                                                            | $\eta$ -j <sup>a</sup> | Electrolyte solution                 | Reference                                      |
|---------------------------------------------------------------------|------------------------|--------------------------------------|------------------------------------------------|
| Ru/TiO <sub>2</sub> -V <sub>0</sub> @C-15                           | 64-10                  | 1.0 M KOH                            | This work                                      |
| R-TiO <sub>2</sub> :Ru (5%)                                         | 150-10                 | 0.1 M KOH                            | <i>J. Am. Chem. Soc.</i> , 140 (2018), 5719    |
| Ru/C <sub>3</sub> N <sub>4</sub> /C                                 | 79-10                  | 0.1 M KOH                            | <i>J. Am. Chem. Soc.</i> , 138 (2016), 16174   |
| Cu <sub>2-x</sub> @Ru                                               | 82-10                  | 1.0 M KOH                            | <i>Small</i> , 13 (2017), 1700052              |
| Ru <sub>SA</sub> -N-S-Ti <sub>3</sub> C <sub>2</sub> T <sub>x</sub> | 76-10                  | 0.5 M H <sub>2</sub> SO <sub>4</sub> | <i>Adv. Mater.</i> , 31 (2019), 1903841        |
| ECM@Ru                                                              | 63-10                  | 0.5 M H <sub>2</sub> SO <sub>4</sub> | <i>Adv. Energy Mater.</i> , 10 (2020), 2000882 |
| Sr <sub>2</sub> RuO <sub>4</sub>                                    | 61-10                  | 1.0 M KOH                            | <i>Nat. Commun.</i> , 10 (2019), 149           |
| Ni-doped RuO <sub>2</sub> NWs                                       | 52-10                  | 1.0 M KOH                            | <i>J. Mater. Chem. A</i> , 7 (2019), 6411      |
| RuS <sub>x</sub> /S-GO                                              | 58-10                  | 1.0 M KOH                            | <i>Small</i> , 15 (2019), 1904043              |
| Ru <sub>0.33</sub> Se@TNA                                           | 57-10                  | 1.0 M KOH                            | <i>Small</i> , 14 (2018), 1802132              |
| hydrous RuO <sub>2</sub>                                            | 60-10                  | 1.0 M KOH                            | <i>Chem. Phys. Lett.</i> , 673 (2017), 89-92   |
| Pt-Ru-Mo                                                            | 196-10                 | Seawater                             | <i>J. Mater. Chem. A</i> , 4 (2016), 6513      |
| Pt@2D-Ni(OH) <sub>2</sub>                                           | 123-4.2                | 0.1 M KOH                            | <i>Nano Energy</i> , 31 (2017), 456            |

|                       |          |                                      |                                                   |
|-----------------------|----------|--------------------------------------|---------------------------------------------------|
| Ru/SiNWs              | 200-10   | 0.5 M H <sub>2</sub> SO <sub>4</sub> | <i>Electrochem. Commun.</i> , 52 (2015), 29       |
| Ru-CNT                | 63-4.874 | 0.5 M H <sub>2</sub> SO <sub>4</sub> | <i>Int. J. Hydrogen Energy</i> , 41 (2016), 23007 |
| RuP <sub>2</sub> @NPC | 52-10    | 1.0 M KOH                            | <i>Angew. Chem., Int. Ed.</i> , 56 (2017), 11559  |
| GCE-S-CNs-1000-CB-Ru  | ~80-10   | 0.5 M H <sub>2</sub> SO <sub>4</sub> | <i>Carbon</i> 93 (2015), 762                      |

[a]  $\eta$  represents the overpotential calculated at the current density of  $j$  ( $j/\text{mA cm}^{-2}$ ).

**Table S3.** H<sub>2</sub> chemisorption results for different Ru/TiO<sub>2</sub>-V<sub>o</sub>@C catalysts.

| Sample                                    | H <sub>2</sub> uptake (mmol <sub>H<sub>2</sub></sub> g <sub>Ru</sub> <sup>-1</sup> ) |
|-------------------------------------------|--------------------------------------------------------------------------------------|
| Ru/TiO <sub>2</sub> -V <sub>o</sub> @C-5  | 0.273                                                                                |
| Ru/TiO <sub>2</sub> -V <sub>o</sub> @C-10 | 0.338                                                                                |
| Ru/TiO <sub>2</sub> -V <sub>o</sub> @C-15 | 0.394                                                                                |
| Ru/TiO <sub>2</sub> -V <sub>o</sub> @C-20 | 0.356                                                                                |

**Table S4.** The EPR semi-quantitative analysis results for different catalysts.

| Sample                                           | Amount of oxygen vacancies (spins/g) |
|--------------------------------------------------|--------------------------------------|
| Ru/TiO <sub>2</sub> -V <sub>o</sub> @C-5         | 1.436*10 <sup>18</sup>               |
| Ru/TiO <sub>2</sub> -V <sub>o</sub> @C-10        | 6.928*10 <sup>18</sup>               |
| Ru/TiO <sub>2</sub> -V <sub>o</sub> @C-15        | 8.462*10 <sup>18</sup>               |
| Ru/TiO <sub>2</sub> -V <sub>o</sub> @C-20        | 7.665 *10 <sup>18</sup>              |
| Ru/TiO <sub>2</sub> -V <sub>o</sub> @C-25        | 1.561*10 <sup>15</sup>               |
| Ru/TiO <sub>2</sub> -V <sub>o</sub> @C-15-800 °C | 8.355*10 <sup>16</sup>               |

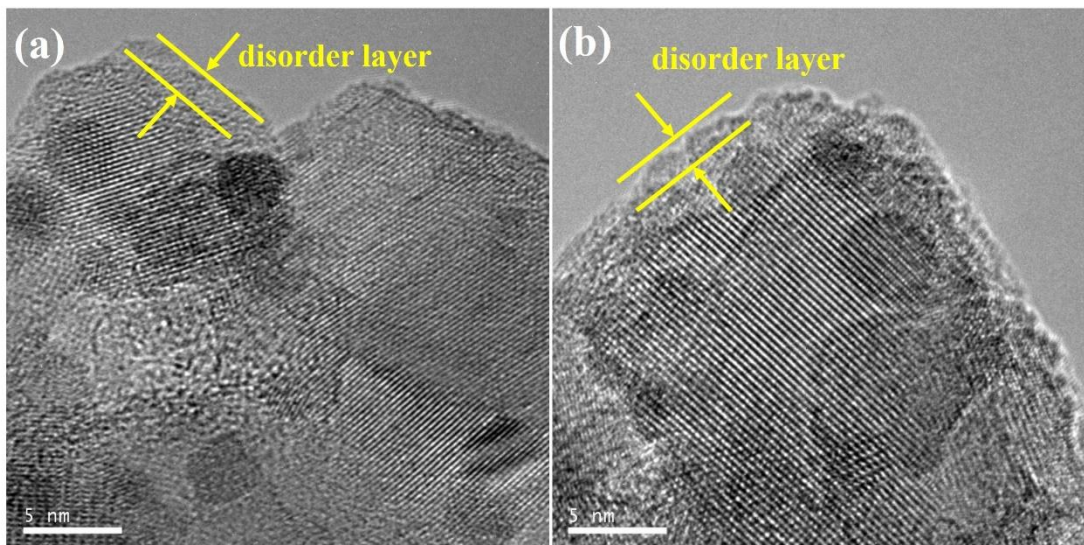

**Figure S1.** HRTEM images of Ru/TiO<sub>2</sub>-Vo@C-15 to show the oxygen vacancies on TiO<sub>2</sub>.

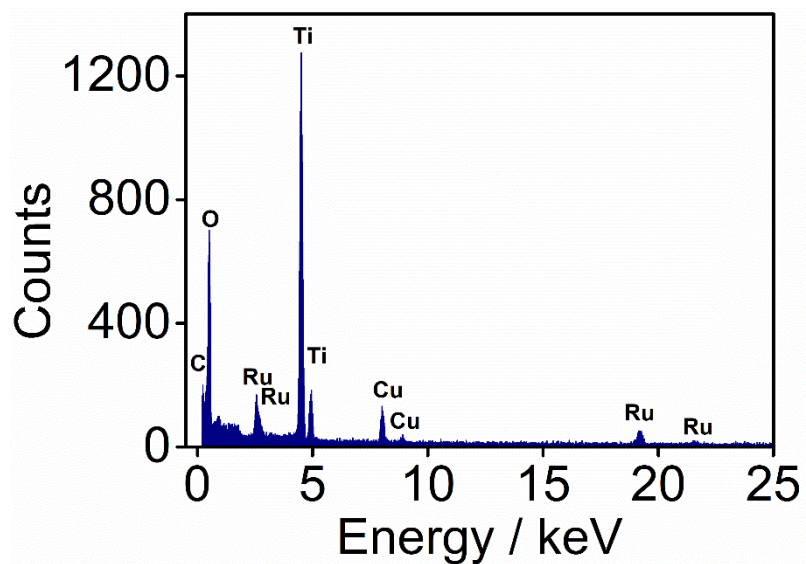

**Figure S2.** The energy dispersive X-ray (EDX) spectrum of Ru/TiO<sub>2</sub>-Vo@C-15.

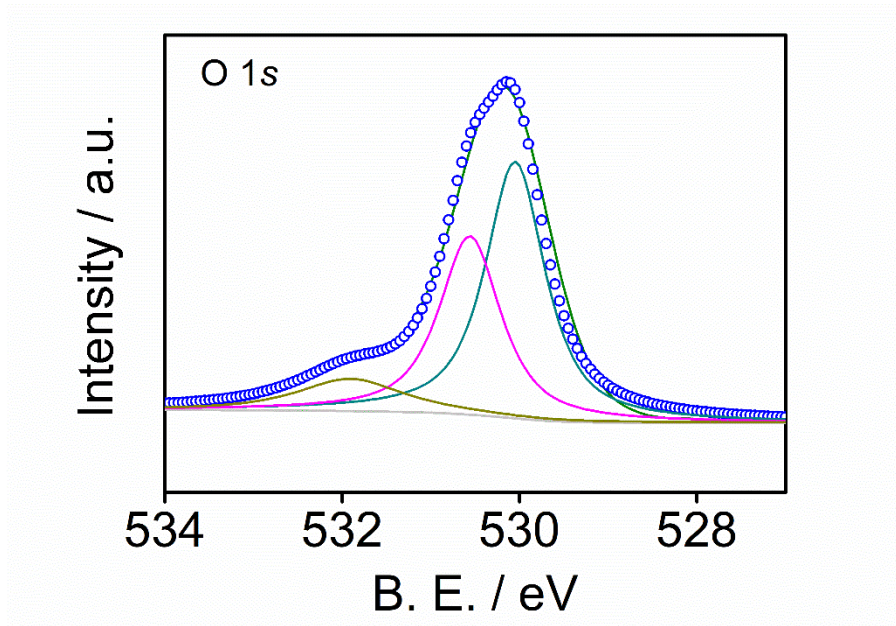

**Figure S3.** O 1s XPS spectrum for Ru/TiO<sub>2</sub>-V<sub>o</sub>@C-15.

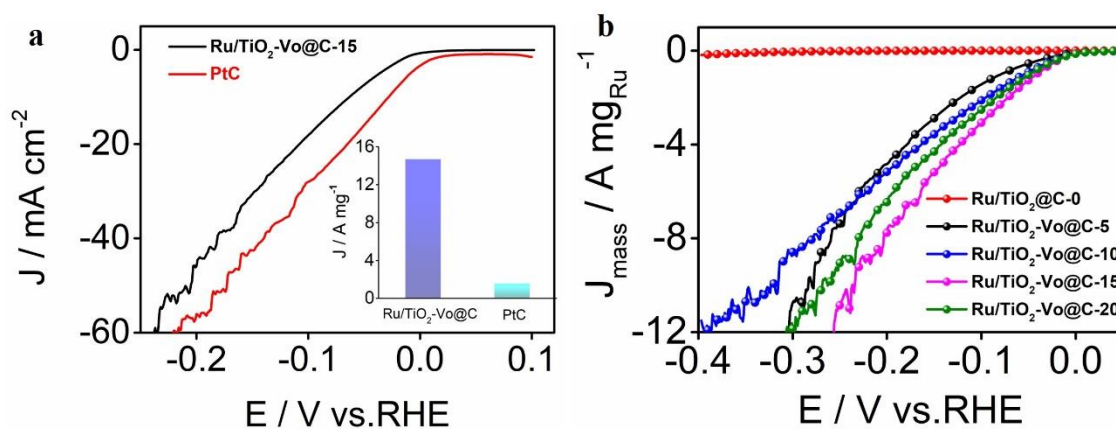

**Figure S4.** (a) Polarization curves of Ru/TiO<sub>2</sub>-V<sub>o</sub>@C-15 and Pt/C in 1 M KOH. The inset shows the mass activity of Ru/TiO<sub>2</sub>-V<sub>o</sub>@C-15 and Pt/C at an overpotential of -300 mV (vs reversible hydrogen electrode, RHE). (b) The mass activities of the catalysts (normalized the currents by Ru contents).



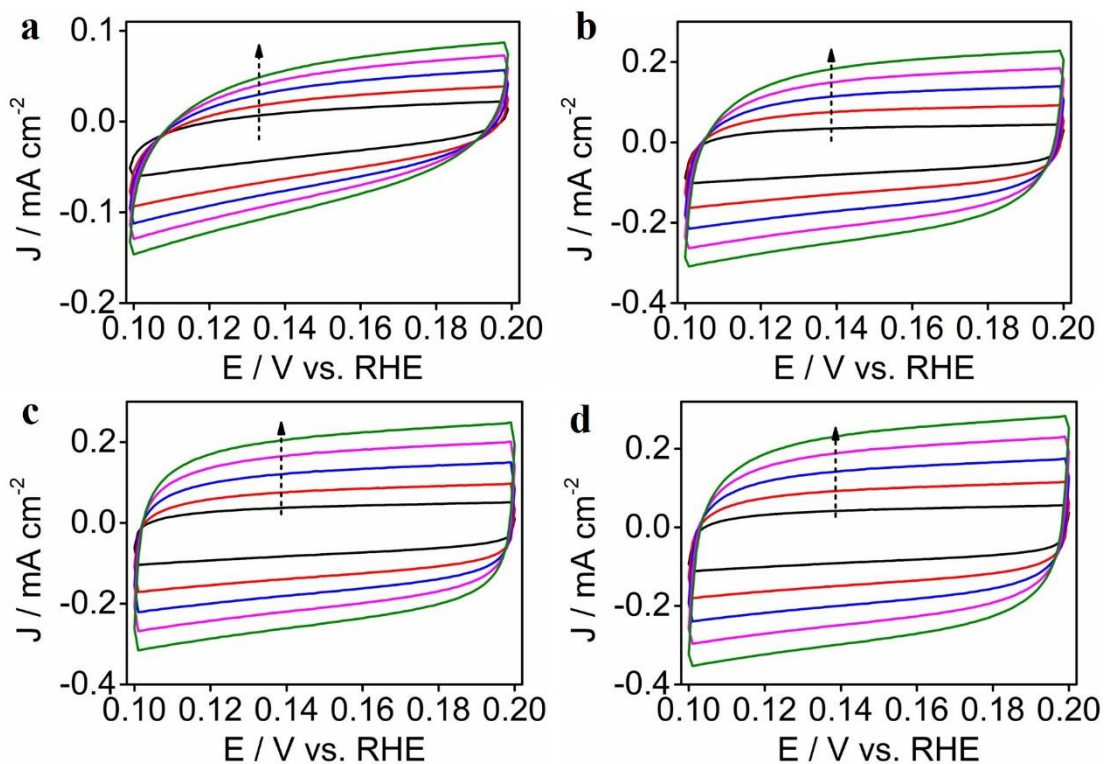

**Figure S5.** Cyclic voltammograms of (a) Ru/TiO<sub>2</sub>-Vo@C-5, (b) Ru/TiO<sub>2</sub>-Vo@C-10, (c) Ru/TiO<sub>2</sub>-Vo@C-15 and (d) Ru/TiO<sub>2</sub>-Vo@C-20, respectively. The arrow indicates the scan rate from 10 mV to 50 mV.

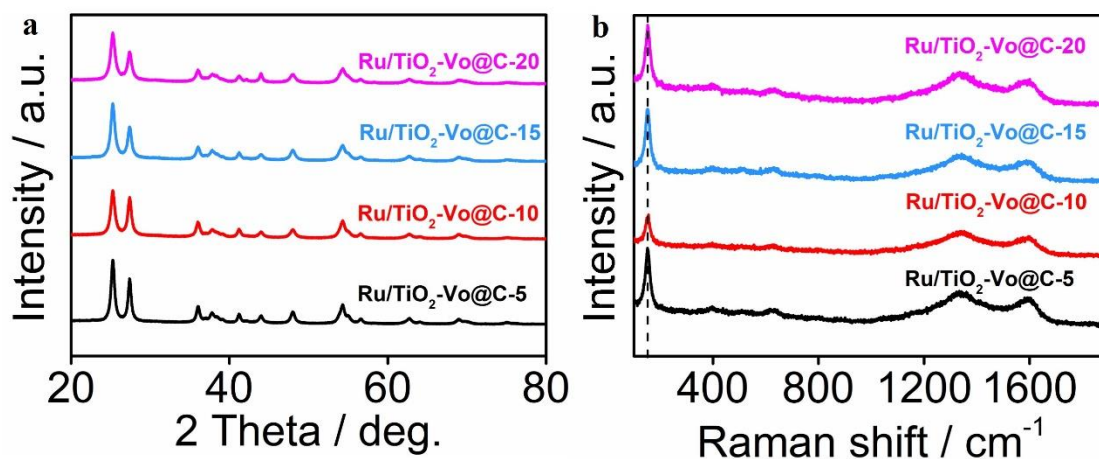

**Figure S6.** XRD and Raman patterns of Ru/TiO<sub>2</sub>-Vo@C-X (X = 5, 10, 15 and 20).

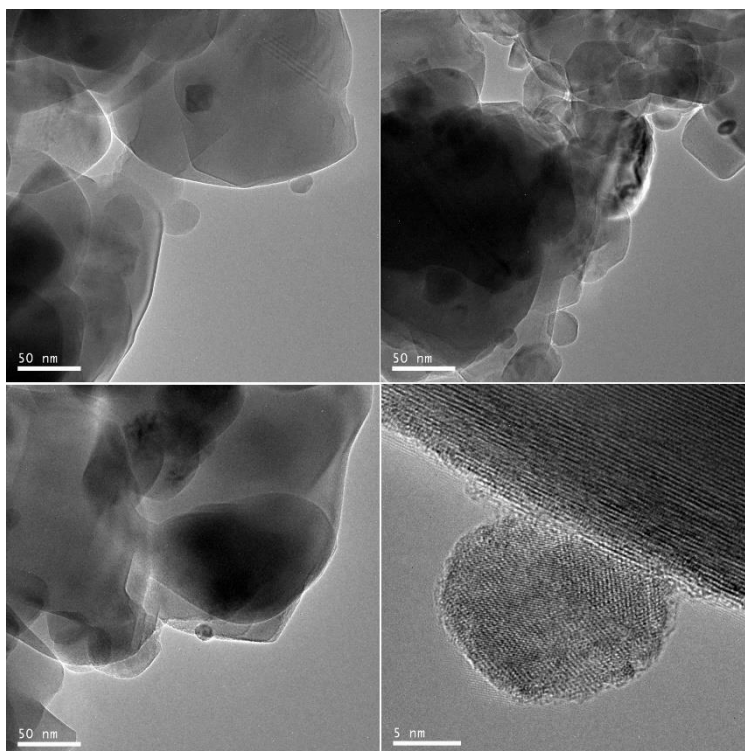

**Figure S7.** Represented TEM and HRTEM images of Ru/TiO<sub>2</sub>@C-0.

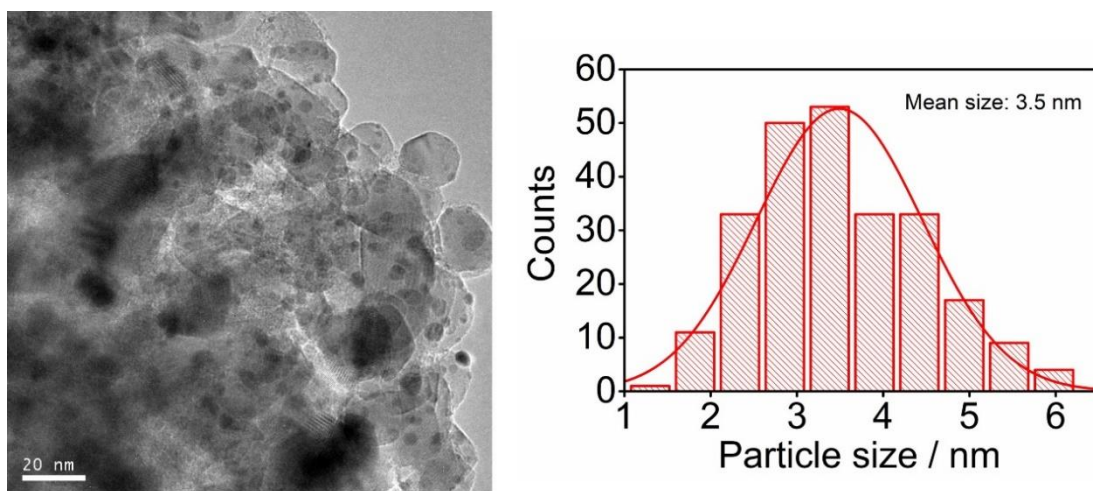

**Figure S8.** TEM image and corresponding Ru particle size distribution histogram of Ru/TiO<sub>2</sub>-Vo@C-5.

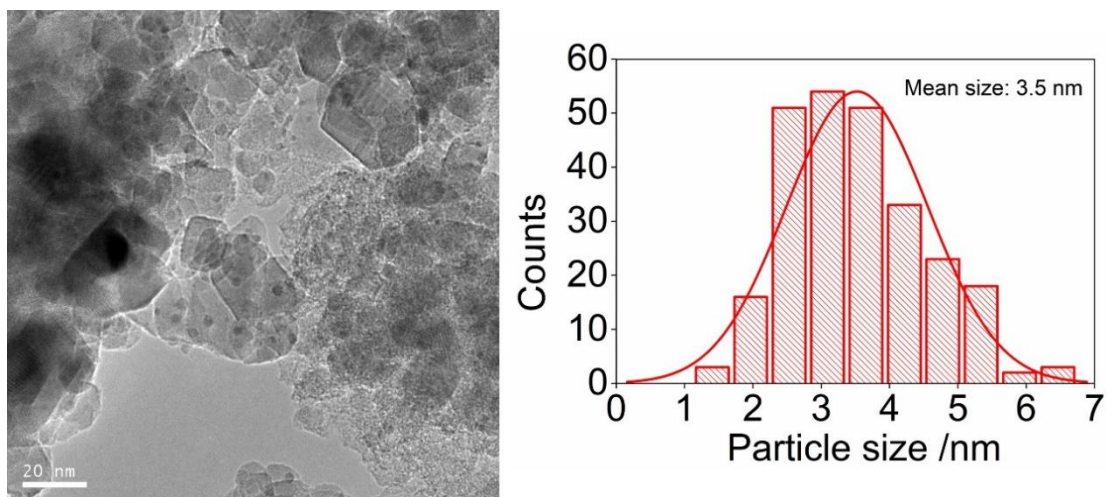

**Figure S9.** TEM image and corresponding Ru particle size distribution histogram of Ru/TiO<sub>2</sub>-Vo@C-10.

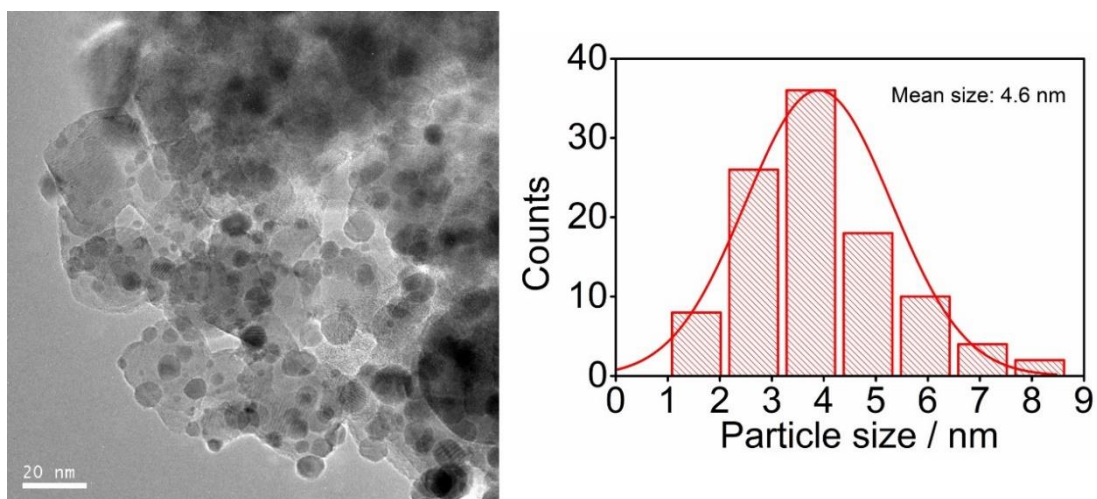

**Figure S10.** TEM image and corresponding Ru particle size distribution histogram of Ru/TiO<sub>2</sub>-Vo@C-20.

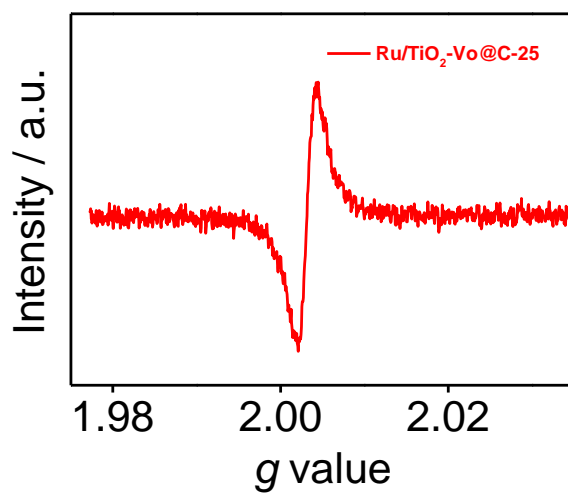

**Figure S11.** EPR signal of Ru/TiO<sub>2</sub>-Vo@C-25.



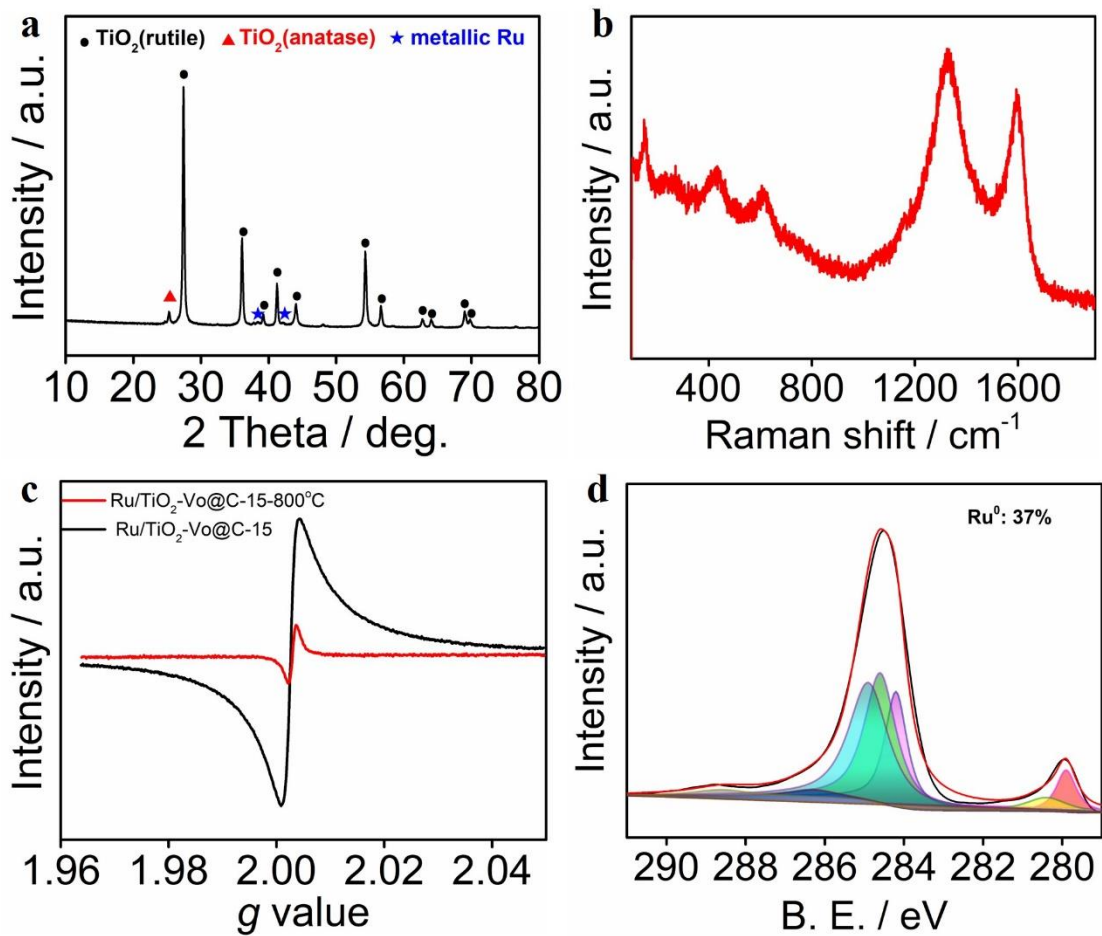

**Figure S12.** (a) XRD pattern, (b) Raman spectrum, (c) EPR spectra, and (d) Ru 3d XPS spectrum of Ru/TiO<sub>2</sub>-V<sub>o</sub>@C-15-800 °C.

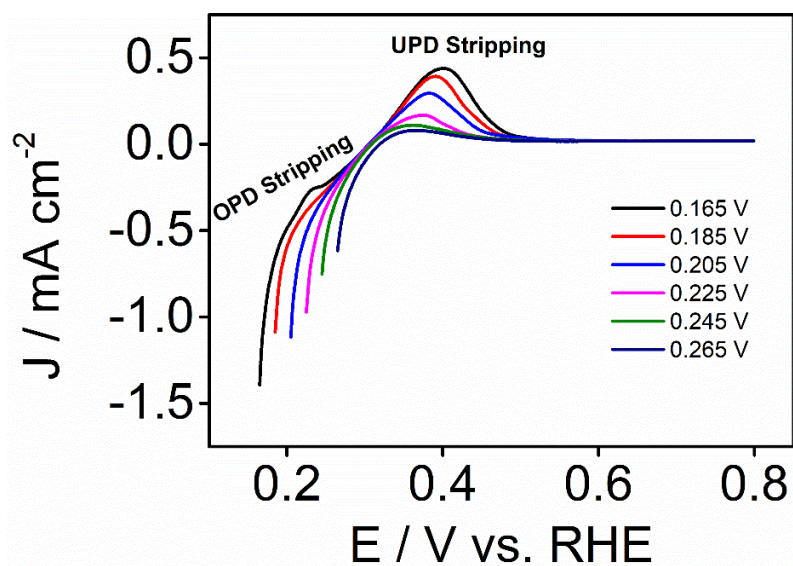

**Figure S13.** LSV curves of Ru/TiO<sub>2</sub>-V<sub>o</sub>@C-15 under different initial voltages.

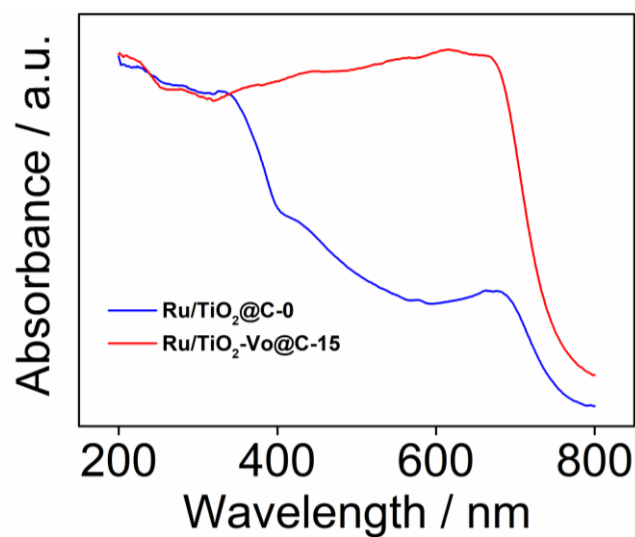

**Figure S14.** Diffuse reflectance UV-vis spectrum of Ru/TiO<sub>2</sub>-V<sub>o</sub>@C-15 and Ru/TiO<sub>2</sub>@C-0.

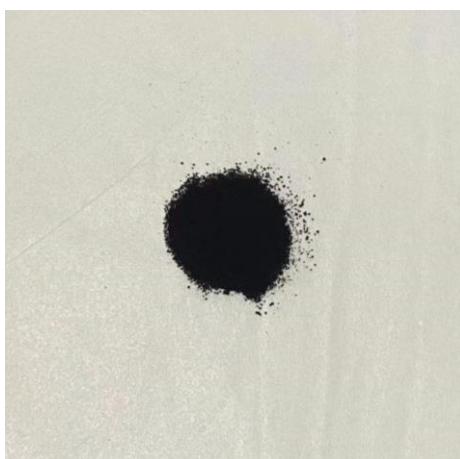

**Figure S15.** Optical image for Ru/TiO<sub>2</sub>-V<sub>o</sub>@C-15.

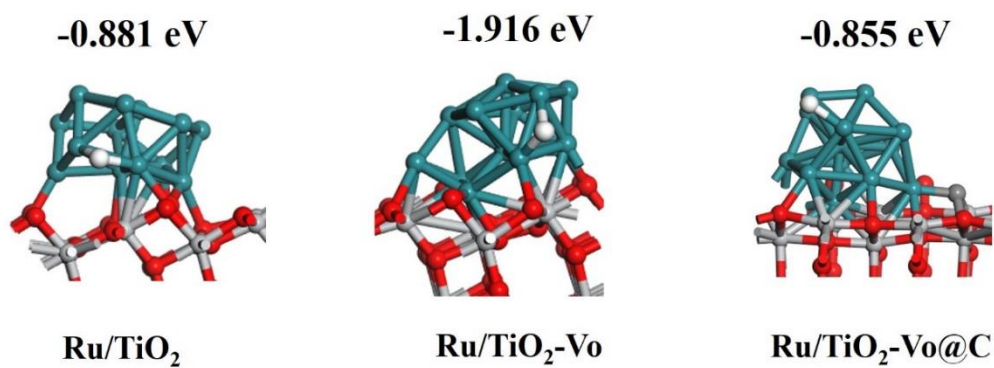

**Figure S16.** The H<sup>\*</sup> adsorption energies of Ru/TiO<sub>2</sub>, Ru/TiO<sub>2</sub>-V<sub>o</sub> and Ru/TiO<sub>2</sub>-V<sub>o</sub>@C and corresponding structures.
